# Supplementary material
Source: Springer Nature journal article supplement (https://www.springermedizin.de/resource/supplementary/12939_2003_14_MOESM1_ESM.pdf/9551272)

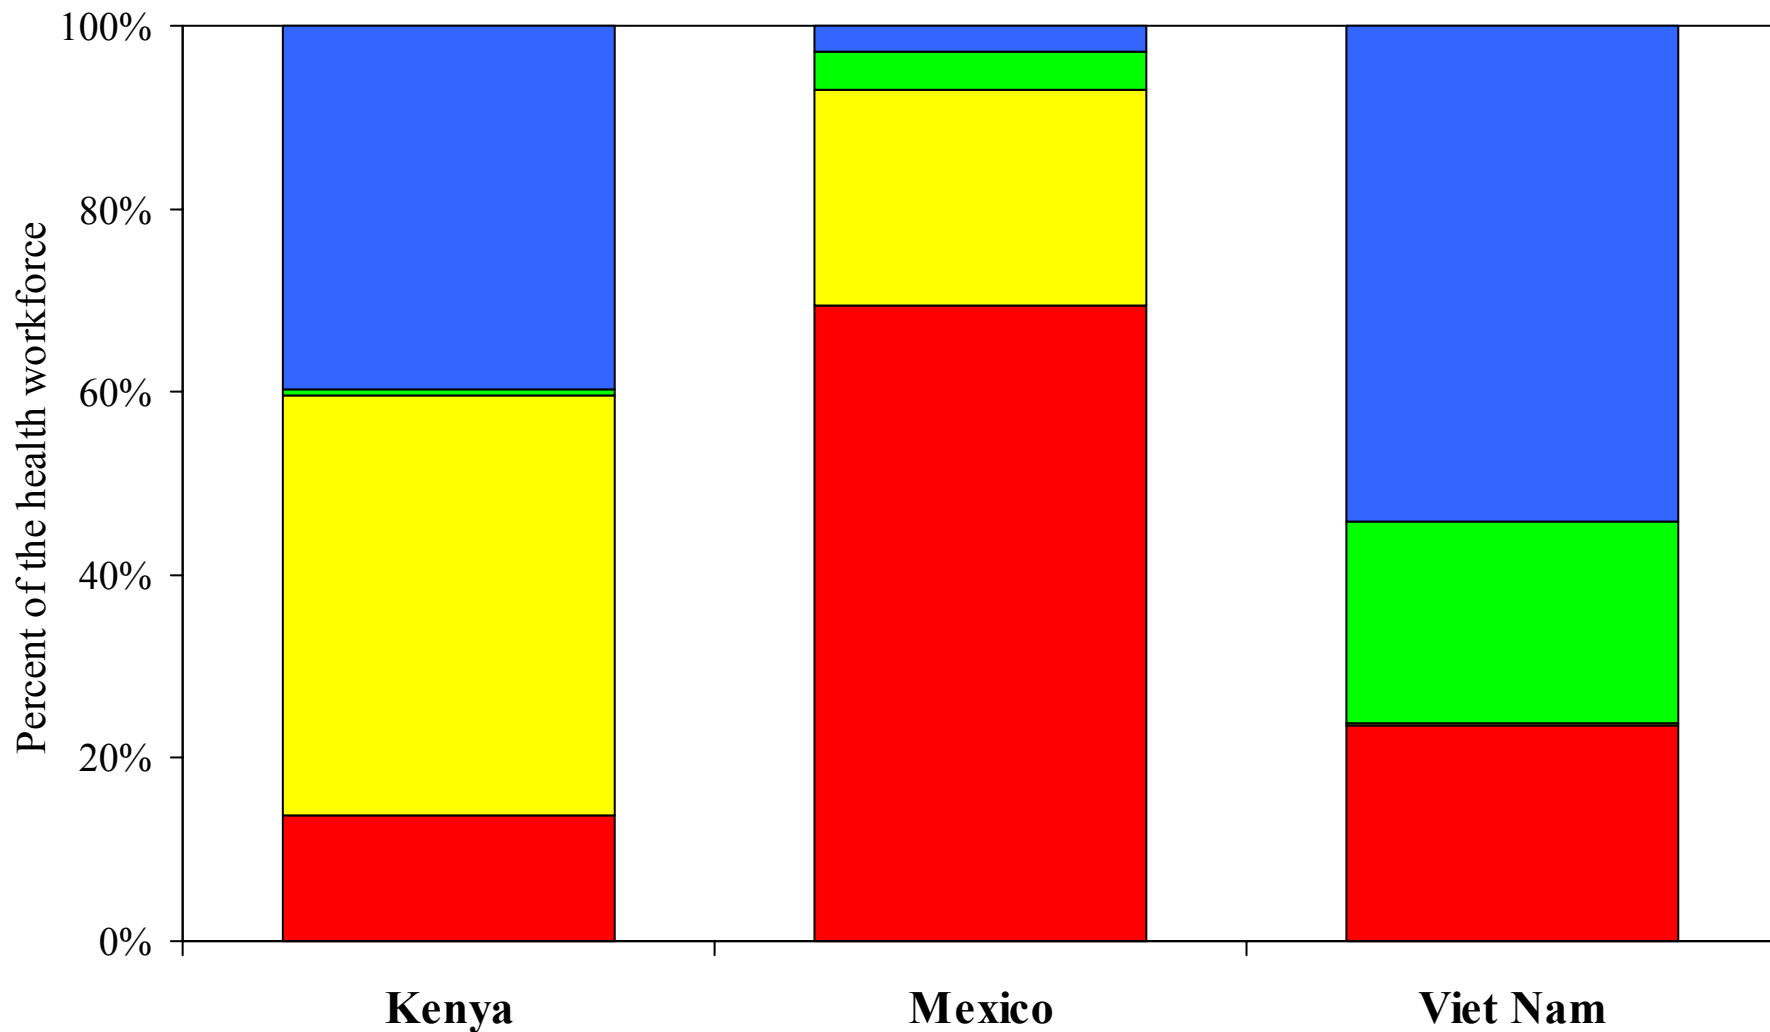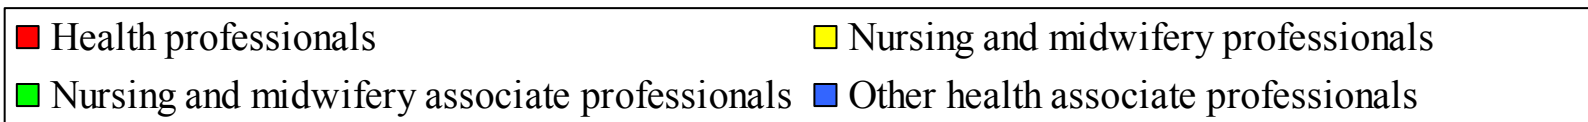

Supplement: MOESM1 [file 9551272]
